# Supplementary material for: Misexpression of a transcriptional repressor candidate provides a molecular mechanism for the suppression of awns by Tipped 1 in wheat
Source: PubMed Central journal article supplement (PMC7307850; doi:10.1093/jxb/eraa106), 2020-02-27
Supplement: eraa106_suppl_supplementary_tables_s1-s4_figures_s1-s5.pdf [file eraa106_suppl_supplementary_tables_s1-s4_figures_s1-s5.pdf]

# **Mis-expression of a transcriptional repressor candidate provides a molecular mechanism for the suppression of awns by *Tipped 1* in wheat**

Tobias Würschum<sup>1,†</sup>, Felix Jähne<sup>1</sup>, Andrew L. Phillips<sup>2</sup>, Simon M. Langer<sup>1,\*</sup>, C. Friedrich H. Longin<sup>1</sup>, Matthew R. Tucker<sup>3</sup>, Willmar L. Leiser<sup>1</sup>

<sup>1</sup> State Plant Breeding Institute, University of Hohenheim, 70593 Stuttgart, Germany

<sup>2</sup> Rothamsted Research, Harpenden AL5 2JQ, United Kingdom

<sup>3</sup> School of Agriculture, Food and Wine, University of Adelaide, Waite Campus, Urrbrae, SA, Australia

\* Current address: BASF Agricultural Solutions Seed GmbH, Gatersleben, Germany

† Correspondence: tobias.wuerschum@uni-hohenheim.de

## **Supporting data**

**Table S1.** Summary statistics for awnedness.

|                         | Awns    |
|-------------------------|---------|
| Min                     | -0.20   |
| Mean                    | 0.31    |
| Max                     | 2.02    |
| $\sigma_G^2$            | 0.350** |
| $\sigma_{G \times E}^2$ | 0.015** |
| $\sigma_e^2$            | 0.046   |
| $h^2$                   | 0.94    |

Genotypic variance ( $\sigma_G^2$ ), genotype-by-environment interaction variance ( $\sigma_{G \times E}^2$ ), error variance ( $\sigma_e^2$ ), and heritability

( $h^2$ ). \*\* significant at the 0.01 probability level.

**Table S2.** Proportion of explained genotypic variance of all mapped markers significant at the Bonferroni-corrected significance threshold of  $P < 0.01$  in a joint fit of all the markers in the order of their  $P$  values (lowest modelled first).

| Marker   | Chr. | Pos. (cM) | Pos. (bp) <sup>a</sup> | $P$ value | $p_G^b$ | $\alpha$ Effect | $p^c$ |
|----------|------|-----------|------------------------|-----------|---------|-----------------|-------|
| D1108250 | 2A   | 137.6     | 579,695,033            | 8.3e-8    | 0.58    | 0.31            | 0.10  |
| D2334730 | 5A   | 270.1     | 690,002,376            | 1.6e-8    | 0.50    | -0.25           | 0.35  |
| S1134493 | 5A   | 293.1     | 698,528,378            | 9.7e-123  | 1.83    | -0.86           | 0.07  |
| D3025003 | 5A   | 293.1     | 701,887,287            | 1.9e-9    | 0.04    | -0.21           | 0.14  |
| D993093  | 5A   | 293.6     | 698,530,966            | 3.4e-185  | 74.60   | -0.81           | 0.11  |
| D1152422 | 5A   | 294.3     | 702,849,155            | 8.7e-21   | 0.01    | 0.57            | 0.06  |
| D3026411 | 5A   | 299.1     | 708,545,706            | 7.5e-12   | 0.07    | 0.26            | 0.20  |
| D1273973 | 5A   | 299.1     |                        | 4.2e-11   | 0.00    | -0.06           | 0.64  |
| D1108207 | 5A   | 299.1     | 706,661,604            | 5.8e-10   | 0.00    | 0.21            | 0.21  |
| D1102111 | 5A   | 299.1     |                        | 2.7e-9    | 0.03    | -0.05           | 0.63  |
| D1033566 | 1B   | 104.0     | 19,615,432             | 9.6e-8    | 0.06    | -0.18           | 0.15  |
| S1020677 | 1B   | 307.4     | 536,709,124            | 1.1e-7    | 0.63    | 0.54            | 0.27  |
| D1132070 | 3B   | 247.7     | 5A: 708,449,614        | 1.2e-12   | 0.10    | 0.29            | 0.17  |
| S1208156 | 3B   | 253.7     | 5A: 683,133,122        | 3.9e-10   | 0.01    | 0.39            | 0.05  |
| D1102561 | 3B   | 260.3     | 5A: 706,549,464        | 4.8e-12   | 0.01    | -0.05           | 0.62  |
| D1207515 | 3B   | 272.2     | 5A: 708,449,611        | 9.7e-19   | 0.06    | 0.31            | 0.16  |
| D1107535 | 3B   | 272.3     | 5A: 708,820,579        | 2.3e-7    | 0.02    | 0.20            | 0.28  |
| D1242846 | 4B   | 129.9     | 653,711,185            | 2.9e-8    | 0.43    | 0.30            | 0.14  |
| D1052287 | 7B   | 23.9      | 14,697,845             | 1.1e-12   | 0.51    | -0.57           | 0.06  |
| D1200016 | 7B   | 24.1      |                        | 2.7e-7    | 0.13    | 0.24            | 0.20  |
| D1068180 | 1D   | 43.6      | 12,986,193             | 1.4e-7    | 0.52    | -0.41           | 0.11  |
| D1094530 | 1D   | 98.1      | 49,977,861             | 9.3e-8    | 0.71    | 0.28            | 0.15  |
| D1402493 | 6D   | 187.2     | 462,479,338            | 7.9e-8    | 1.10    | 0.25            | 0.24  |

<sup>a</sup> physical positions of the markers based on IWGSC RefSeq v1.0

<sup>b</sup> proportion of explained genotypic variance

<sup>c</sup> frequency of the allele increasing awnedness

**Table S3.** Analysis of the TraesCS5A01G542800 promotor InDel sequence for transcription factor binding sites by PlantPAN 3.0.

TraesCS5A01G542800 promotor InDel sequence:

```
TCACGAAATTCCACGGAAGTAGGCCAGGTACAAATACACGGAAGTA
TCACGAAATTC-----CACGGAAGTA
1          11                      37      46
```

**Arabidopsis thaliana:**

| Matrix ID         | Family            | Position | Strand | Similar Score | Hit Sequence     | TF ID or Motif name                                                                                                                                                                                                                                         |
|-------------------|-------------------|----------|--------|---------------|------------------|-------------------------------------------------------------------------------------------------------------------------------------------------------------------------------------------------------------------------------------------------------------|
| TFmatrixID_0605   | B3                | 32       | -      | 0.86          | aaaTACACgg       | AT4G31610                                                                                                                                                                                                                                                   |
| TF_motif_seq_0244 | SBP               | 27       | -      | 1             | GGTAC            | AT2G33810; AT2G47070                                                                                                                                                                                                                                        |
| TF_motif_seq_0244 | SBP               | 28       | +      | 1             | GTACA            | AT2G33810; AT2G47070                                                                                                                                                                                                                                        |
| TF_motif_seq_0257 | NF-YB;NF-YA;NF-YC | 31       | +      | 0.8           | CAAAAT           | AT1G09030; AT1G17590; AT1G21970; AT1G30500; AT1G54160; AT1G54830; AT1G56170; AT1G72830; AT2G38880; AT2G47810; AT3G05690; AT3G14020; AT3G20910; AT3G53340; AT4G14540; AT5G06510; AT5G12840; AT5G27910; AT5G38140; AT5G47640; AT5G47670; AT5G50470; AT5G50480 |
| TF_motif_seq_0258 | Dehydrin          | 19       | -      | 0.8           | GTAGG            | U01377                                                                                                                                                                                                                                                      |
| TF_motif_seq_0267 | Trihelix          | 27       | +      | 0.8           | GGTAC            | AT5G01380                                                                                                                                                                                                                                                   |
| TF_motif_seq_0271 | bZIP              | 1        | +      | 0.8           | TCACG            | AT1G77920; AT3G12250; AT5G06950; AT5G06960; AT5G10030; AT5G65210; AT1G22070; AT1G20980; AT1G27360; AT1G27370; AT1G53160; AT1G69170; AT1G76580; AT2G33810; AT2G42200; AT2G47070; AT3G15270; AT3G57920; AT3G60030; AT5G18830; AT5G43270                       |
| TF_motif_seq_0508 | SBP               | 25       | +      | 0.75          | caGGTACaa        | AT2G33810; AT2G42200; AT2G47070; AT3G15270; AT3G57920; AT3G60030; AT5G18830; AT5G43270                                                                                                                                                                      |
| TFmatrixID_1354   | NAC; NAM          | 28       | +      | 0.9           | gtacaaatACACGgaa | AT5G07680                                                                                                                                                                                                                                                   |
| TFmatrixID_1563   | NAC; NAM          | 9        | -      | 0.91          | ttccACGGAagta    | AT1G52890                                                                                                                                                                                                                                                   |
| TFmatrixID_1565   | NAC; NAM          | 9        | +      | 0.89          | ttcCACGGAagta    | AT1G52890                                                                                                                                                                                                                                                   |
| TFmatrixID_1567   | NAC; NAM          | 34       | +      | 0.96          | atACACGgaagt     | AT1G52890                                                                                                                                                                                                                                                   |
| TFmatrixID_1571   | NAC; NAM          | 9        | +      | 0.92          | ttcCACGGAagta    | AT3G15500                                                                                                                                                                                                                                                   |
| TFmatrixID_1572   | NAC; NAM          | 34       | +      | 0.98          | atACACGgaagt     | AT3G15500                                                                                                                                                                                                                                                   |
| TFmatrixID_1573   | NAC; NAM          | 9        | +      | 0.89          | ttcCACGGAagta    | AT3G15500                                                                                                                                                                                                                                                   |
| TFmatrixID_1575   | NAC; NAM          | 9        | -      | 0.91          | ttcCACGGAagta    | AT3G15500                                                                                                                                                                                                                                                   |
| TFmatrixID_1576   | NAC; NAM          | 9        | +      | 0.91          | ttcCACGGAagta    | AT3G15500                                                                                                                                                                                                                                                   |
| TFmatrixID_1578   | NAC; NAM          | 34       | +      | 0.95          | atACACGgaagt     | AT3G15500                                                                                                                                                                                                                                                   |
| TFmatrixID_1584   | NAC; NAM          | 34       | +      | 0.86          | atACACGgaagt     | AT5G39610                                                                                                                                                                                                                                                   |
| TFmatrixID_1604   | NAC; NAM          | 34       | +      | 0.93          | atACACGgaagt     | AT1G01720                                                                                                                                                                                                                                                   |
| TFmatrixID_1659   | NAC; NAM          | 35       | +      | 0.93          | tACACGgaagt      | AT1G69490                                                                                                                                                                                                                                                   |
| TFmatrixID_1673   | NAC; NAM          | 34       | +      | 0.87          | atACACGgaagt     | AT3G49530                                                                                                                                                                                                                                                   |
| TFmatrixID_1703   | NAC; NAM          | 10       | +      | 0.9           | tcCACGGAagta     | AT5G66300                                                                                                                                                                                                                                                   |
| TFmatrixID_1706   | NAC; NAM          | 34       | +      | 0.96          | ataCACGGAagt     | AT5G66300                                                                                                                                                                                                                                                   |
| TFmatrixID_1707   | NAC; NAM          | 34       | +      | 0.97          | atACACGgaagt     | AT5G66300                                                                                                                                                                                                                                                   |
| TFmatrixID_1708   | NAC; NAM          | 34       | +      | 0.93          | atACACGgaagt     | AT5G66300                                                                                                                                                                                                                                                   |
| TFmatrixID_1715   | NAC; NAM          | 34       | +      | 0.94          | atACACGgaagt     | AT1G71930                                                                                                                                                                                                                                                   |
| TFmatrixID_1718   | NAC; NAM          | 34       | +      | 0.94          | atACACGgaagt     | AT1G71930                                                                                                                                                                                                                                                   |

|                   |                       |    |   |      |               |                |
|-------------------|-----------------------|----|---|------|---------------|----------------|
| TFmatrixID_1719   | NAC; NAM              | 34 | + | 0.92 | atACACGgaagt  | AT1G71930      |
| TFmatrixID_1721   | NAC; NAM              | 9  | + | 0.9  | ttccACGGAagt  | AT1G71930      |
| TFmatrixID_1721   | NAC; NAM              | 34 | + | 0.93 | atacACGGAagt  | AT1G71930      |
| TFmatrixID_1722   | NAC; NAM              | 9  | + | 0.94 | ttccACGGAagta | AT1G71930      |
| TF_motif_seq_0248 | (Motif sequence only) | 12 | + | 0.8  | CACGG         | MYBCOREATCYCB1 |
| TF_motif_seq_0248 | (Motif sequence only) | 37 | + | 0.8  | CACGG         | MYBCOREATCYCB1 |
| TF_motif_seq_0249 | (Motif sequence only) | 2  | - | 0.8  | CACGA         | ABRELATERD1    |
| TF_motif_seq_0249 | (Motif sequence only) | 12 | - | 0.8  | CACGG         | ABRELATERD1    |
| TF_motif_seq_0249 | (Motif sequence only) | 25 | - | 0.8  | CAGGT         | ABRELATERD1    |
| TF_motif_seq_0249 | (Motif sequence only) | 37 | - | 0.8  | CACGG         | ABRELATERD1    |
| TF_motif_seq_0263 | (Motif sequence only) | 10 | + | 0.8  | TCCAC         | SORLIPIAT      |
| TF_motif_seq_0263 | (Motif sequence only) | 23 | + | 0.8  | GCCAG         | SORLIPIAT      |
| TF_motif_seq_0265 | (Motif sequence only) | 21 | + | 0.8  | AGGCC         | SORLIP2AT      |
| TF_motif_seq_0265 | (Motif sequence only) | 22 | - | 0.8  | GGCCA         | SORLIP2AT      |
| TF motif seq 0323 | (Motif sequence only) | 1  | + | 1    | TCACGa        | RHERPATEXPA7   |

## Oryza sativa:

| Matrix ID         | Family                | Position | Strand | Similar Score | Hit Sequence | TF ID or Motif name                                                                                                                                                                                                                                                  |
|-------------------|-----------------------|----------|--------|---------------|--------------|----------------------------------------------------------------------------------------------------------------------------------------------------------------------------------------------------------------------------------------------------------------------|
| TF_motif_seq_0086 | (Others)              | 32       | -      | 0.73          | aaatacACGGA  | X52153                                                                                                                                                                                                                                                               |
| TF_motif_seq_0257 | NF-YB                 | 31       | +      | 0.8           | CAAAT        | Os01g0834400; Os02g0725900;<br>Os05g0463800; Os05g0573500                                                                                                                                                                                                            |
| TF_motif_seq_0266 | TCP                   | 21       | +      | 0.75          | AGGCC        | Os03g0785800; Os04g0194600;<br>Os12g0616400; Os01g0213800;<br>Os08g0544800; Os11g0175700                                                                                                                                                                             |
| TF_motif_seq_0266 | TCP                   | 21       | -      | 0.75          | AGGCC        | Os03g0785800; Os04g0194600;<br>Os12g0616400; Os01g0213800;<br>Os08g0544800; Os11g0175700                                                                                                                                                                             |
| TF_motif_seq_0266 | TCP                   | 22       | +      | 0.75          | GGCCA        | Os03g0785800; Os04g0194600;<br>Os12g0616400; Os01g0213800;<br>Os08g0544800; Os11g0175700                                                                                                                                                                             |
| TF_motif_seq_0266 | TCP                   | 22       | -      | 0.75          | GGCCA        | Os03g0785800; Os04g0194600;<br>Os12g0616400; Os01g0213800;<br>Os08g0544800; Os11g0175700                                                                                                                                                                             |
| TF_motif_seq_0266 | TCP                   | 27       | +      | 0.75          | GGTAC        | Os03g0785800; Os04g0194600;<br>Os12g0616400; Os01g0213800;<br>Os08g0544800; Os11g0175700                                                                                                                                                                             |
| TF_motif_seq_0266 | TCP                   | 27       | -      | 0.75          | GGTAC        | Os03g0785800; Os04g0194600;<br>Os12g0616400; Os01g0213800;<br>Os08g0544800; Os11g0175700                                                                                                                                                                             |
| TF_motif_seq_0508 | SBP                   | 25       | +      | 0.75          | caGGTACaa    | Os01g0292900; Os01g0922600;<br>Os02g0139400; Os02g0174100;<br>Os02g0177300; Os03g0833300;<br>Os04g0551500; Os05g0408200;<br>Os06g0659100; Os06g0663500;<br>Os06g0703500; Os08g0509600;<br>Os08g0513700; Os08g0531600;<br>Os09g0491532; Os09g0507100;<br>Os11g0496600 |
| TF_motif_seq_0259 | (Motif sequence only) | 11       | +      | 0.8           | CCACG        | CGACGOSAMY3                                                                                                                                                                                                                                                          |
| TF_motif_seq_0372 | (Motif sequence only) | 25       | -      | 0.86          | caGGTAC      | ACGTOSGLUB1                                                                                                                                                                                                                                                          |
| TF motif seq 0425 | (Motif sequence only) | 24       | +      | 0.75          | CCAGGtac     | SITEIOSPCNA                                                                                                                                                                                                                                                          |

**Table S4.** Presence or absence of the 25 bp InDel in the promoter of TraesCS5A02G542800 in cultivars with different awn length.

| Genotype     | Awns         | D993093    | S1134493 | Assumed<br><i>b1/B1</i> | InDel                                        |
|--------------|--------------|------------|----------|-------------------------|----------------------------------------------|
| Bloyka       | long         | 0          | 0        | <i>b1</i>               | CACGAAATTCACGGAAGTAGGCCAGGTACAAATACACGGAAGTA |
| Centinel     | long         | 0          | 0        | <i>b1</i>               | CACGAAATTCACGGAAGTAGGCCAGGTACAAATACACGGAAGTA |
| Glosa        | long         | 0          | 0        | <i>b1</i>               | CACGAAATTCACGGAAGTAGGCCAGGTACAAATACACGGAAGTA |
| Maksat       | long         | 0          | 0        | <i>b1</i>               | CACGAAATTCACGGAAGTAGGCCAGGTACAAATACACGGAAGTA |
| Cornelius    | long         | 0          | 0        | <i>b1</i>               | CACGAAATTCACGGAAGTAGGCCAGGTACAAATACACGGAAGTA |
| Hans         | long         | 0          | 0        | <i>b1</i>               | CACGAAATTCACGGAAGTAGGCCAGGTACAAATACACGGAAGTA |
| Dbdi         | long         | 0          | 0        | <i>b1</i>               | CACGAAATTCACGGAAGTAGGCCAGGTACAAATACACGGAAGTA |
| Mv Lucia     | long         | 0          | 0        | <i>b1</i>               | CACGAAATTCACGGAAGTAGGCCAGGTACAAATACACGGAAGTA |
| Mv-Beres (1) | long         | 0          | 0        | <i>b1</i>               | CACGAAATTCACGGAAGTAGGCCAGGTACAAATACACGGAAGTA |
| Ekiz         | long         | 0          | 0        | <i>b1</i>               | CACGAAATTCACGGAAGTAGGCCAGGTACAAATACACGGAAGTA |
| Konya        | long         | 0          | 0        | <i>b1</i>               | CACGAAATTCACGGAAGTAGGCCAGGTACAAATACACGGAAGTA |
| MV-Taltos    | long         | 0          | 0        | <i>b1</i>               | CACGAAATTCACGGAAGTAGGCCAGGTACAAATACACGGAAGTA |
| Corsaire     | no/short     | 1          | 2        | <i>B1</i>               | CACGAAATTC-----CACGGAAGTA                    |
| Estica       | intermediate | 1          | 2        | <i>B1</i>               | CACGAAATTC-----CACGGAAGTA                    |
| Muza         | intermediate | 1          | 2        | <i>B1</i>               | CACGAAATTC-----CACGGAAGTA                    |
| Aperitiv     | no/short     | 1          | 2        | <i>B1</i>               | CACGAAATTC-----CACGGAAGTA                    |
| Esket        | no/short     | 1          | 2        | <i>B1</i>               | CACGAAATTC-----CACGGAAGTA                    |
| Barryton     | no/short     | 1          | 2        | <i>B1</i>               | CACGAAATTC-----CACGGAAGTA                    |
| Simonida     | intermediate | 1          | 2        | <i>B1</i>               | CACGAAATTC-----CACGGAAGTA                    |
| Impression   | no/short     | NA (1 imp) | 2        | <i>B1</i>               | CACGAAATTC-----CACGGAAGTA                    |
| Batjko       | intermediate | 1          | 2        | <i>B1</i>               | CACGAAATTC-----CACGGAAGTA                    |
| Event        | no/short     | 1          | 2        | <i>B1</i>               | CACGAAATTC-----CACGGAAGTA                    |
| Novo Zvesda  | no/short     | 1          | 2        | <i>B1</i>               | CACGAAATTC-----CACGGAAGTA                    |
| Stava        | no/short     | NA (1 imp) | 2        | <i>B1</i>               | CACGAAATTC-----CACGGAAGTA                    |
| Potenzial    | no/short     | 1          | 2        | <i>B1</i>               | CACGAAATTC-----CACGGAAGTA                    |
| Kranich      | no/short     | 1          | 2        | <i>B1</i>               | CACGAAATTC-----CACGGAAGTA                    |

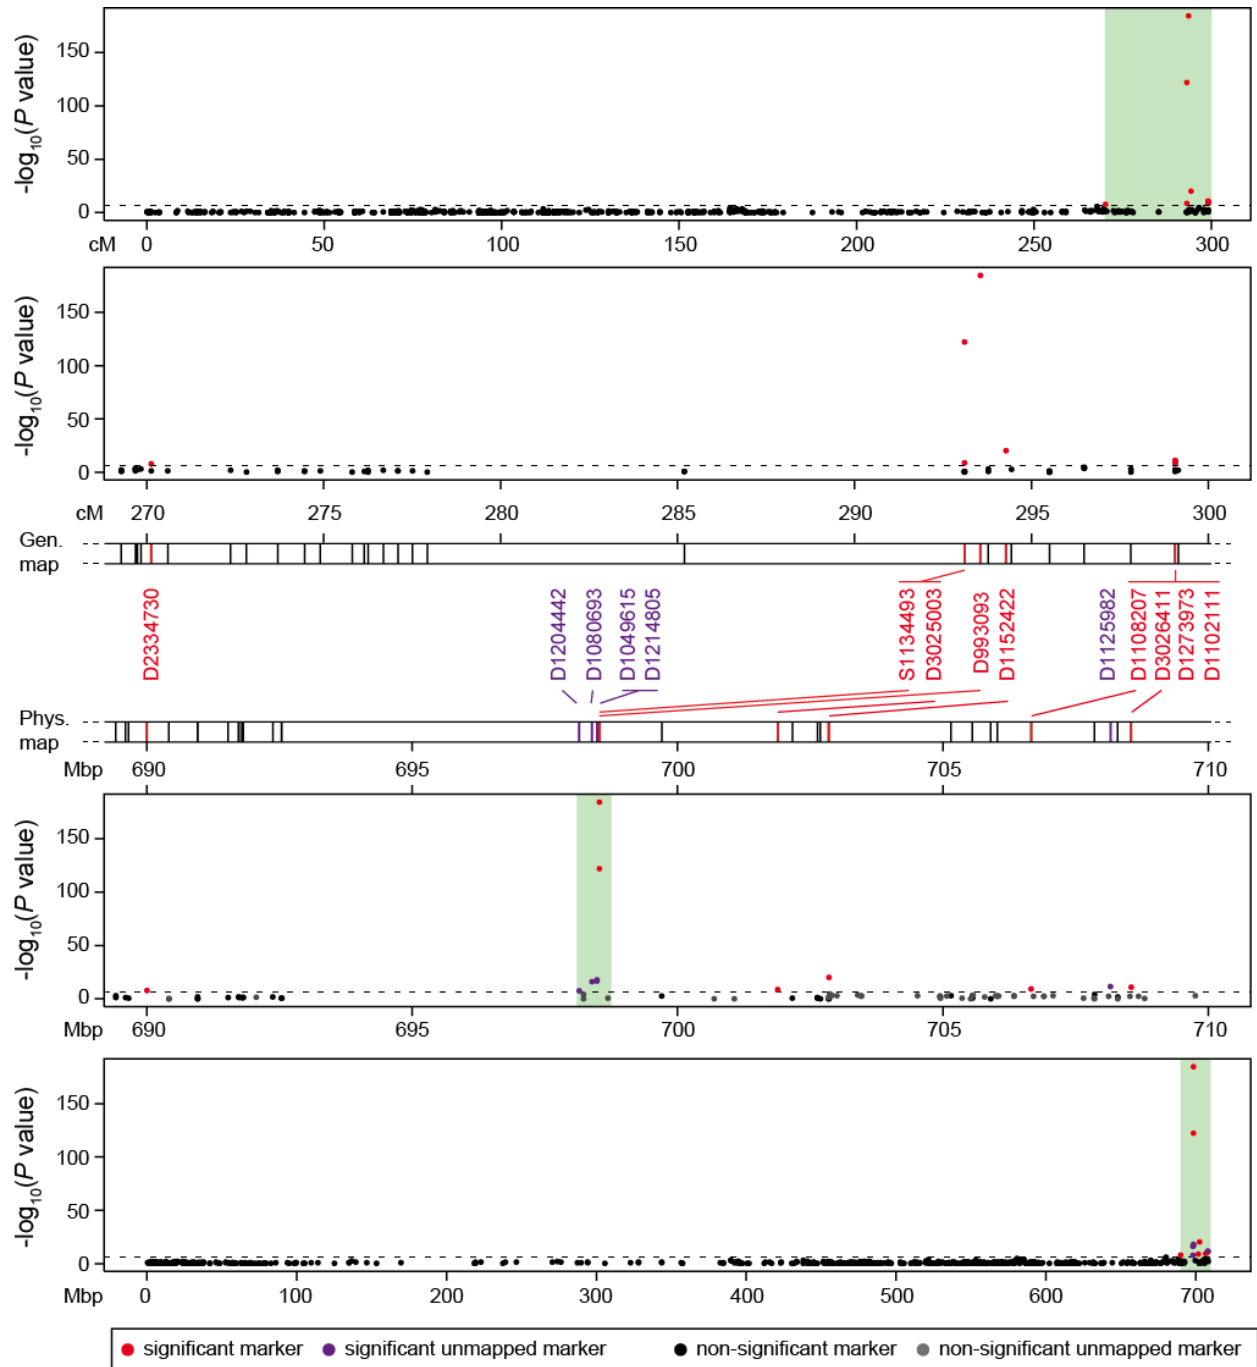

**Fig. S1.** Genetic and physical fine-mapping of the *BI* (*Tipped 1*) locus on chromosome 5A.

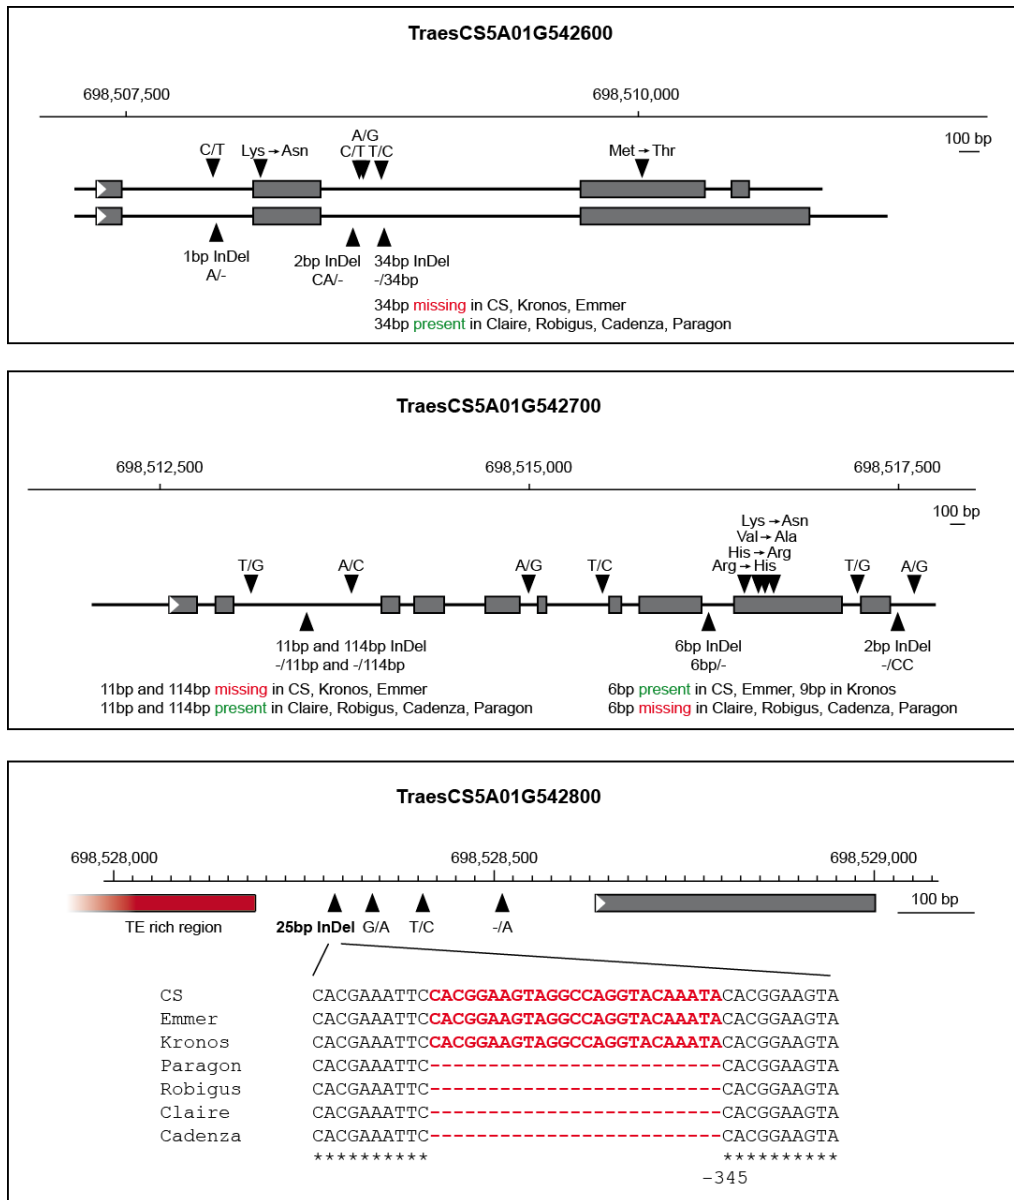

**Fig. S2.** Polymorphisms in the candidate genes TraesCS5A02G542600, TraesCS5A02G542700 and TraesCS5A02G542800. Polymorphisms are indicated relative to Chinese Spring (CS), i.e. ‘T/G’ means that CS, wild Emmer and the durum wheat Kronos (all presumed to carry the wild-type *bl* allele) carry a ‘T’ and Claire, Robigus, Cadenza and Paragon (all presumed to carry *BI*) carry a ‘G’. Data were obtained from the Earlham Institute (<http://www.earlham.ac.uk/grassroots-genomics>) (Avni *et al.*, 2017; Bian *et al.*, 2017; Clavijo *et al.*, 2017).



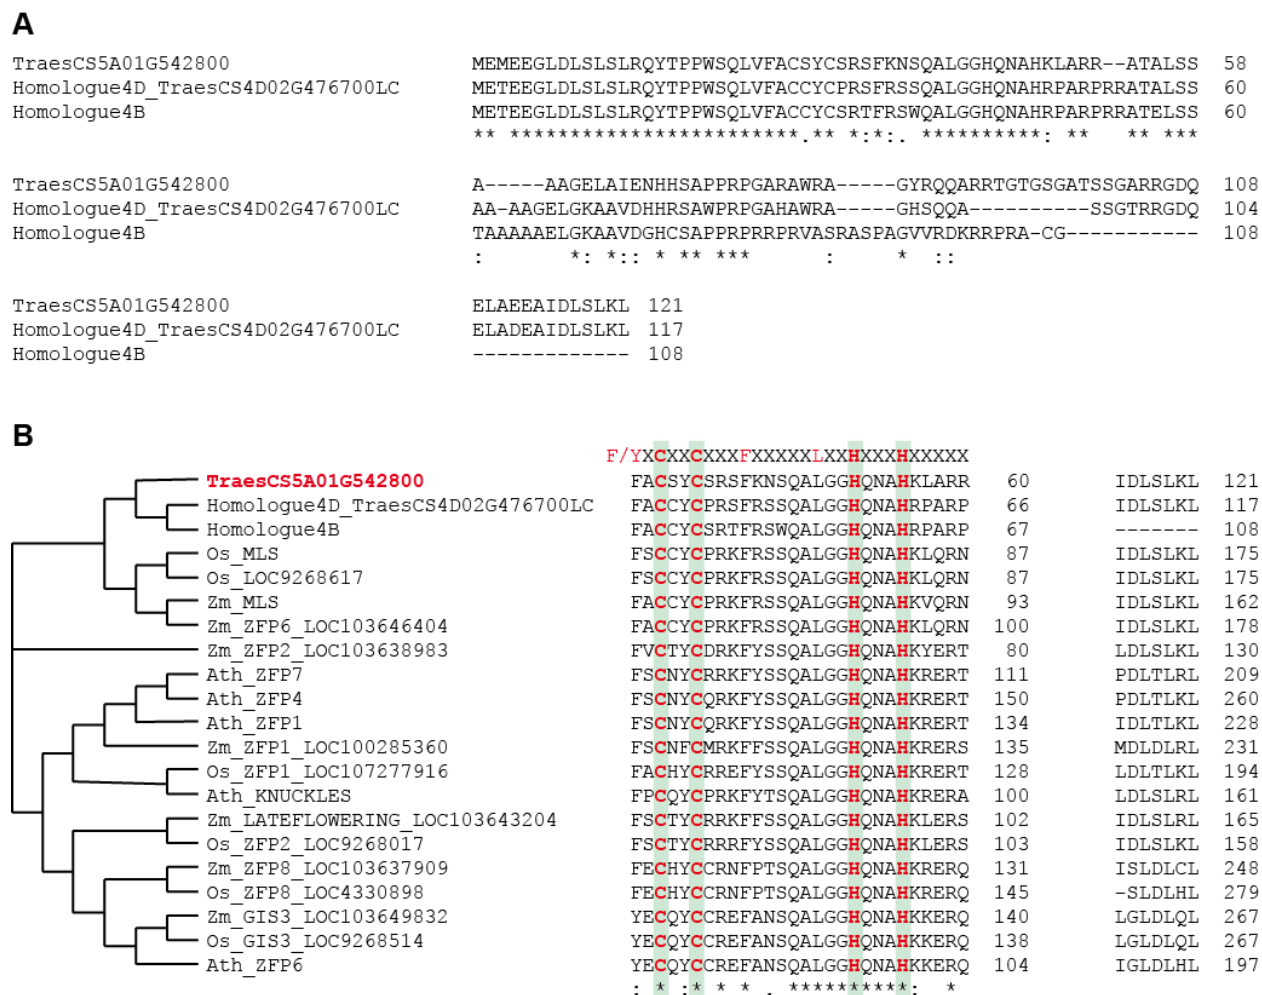

**Fig. S3.** Alignment of protein sequences by CLUSTAL O(1.2.4). (A) The candidate gene TraesCS5A02G542800 and its two putative homologues; the non-annotated 4B homologue lacking the C-terminal region. (B) Multiple sequence alignment of these three wheat proteins, as well as proteins from *Arabidopsis thaliana* (Ath), *Oryza sativa* (Os) and *Zea mays* (Zm) showing similarity in a BLAST against these species. The zinc-finger domain and the EAR-like motif (defined as LxLxL or DLNxxP; Kagale and Rozwadowski 2011) are shown; the name-giving C2H2 cysteine and histidine residues are highlighted, and the submotif QALGGH present in many plant zinc finger proteins is underlined (Takatsuji 1999).

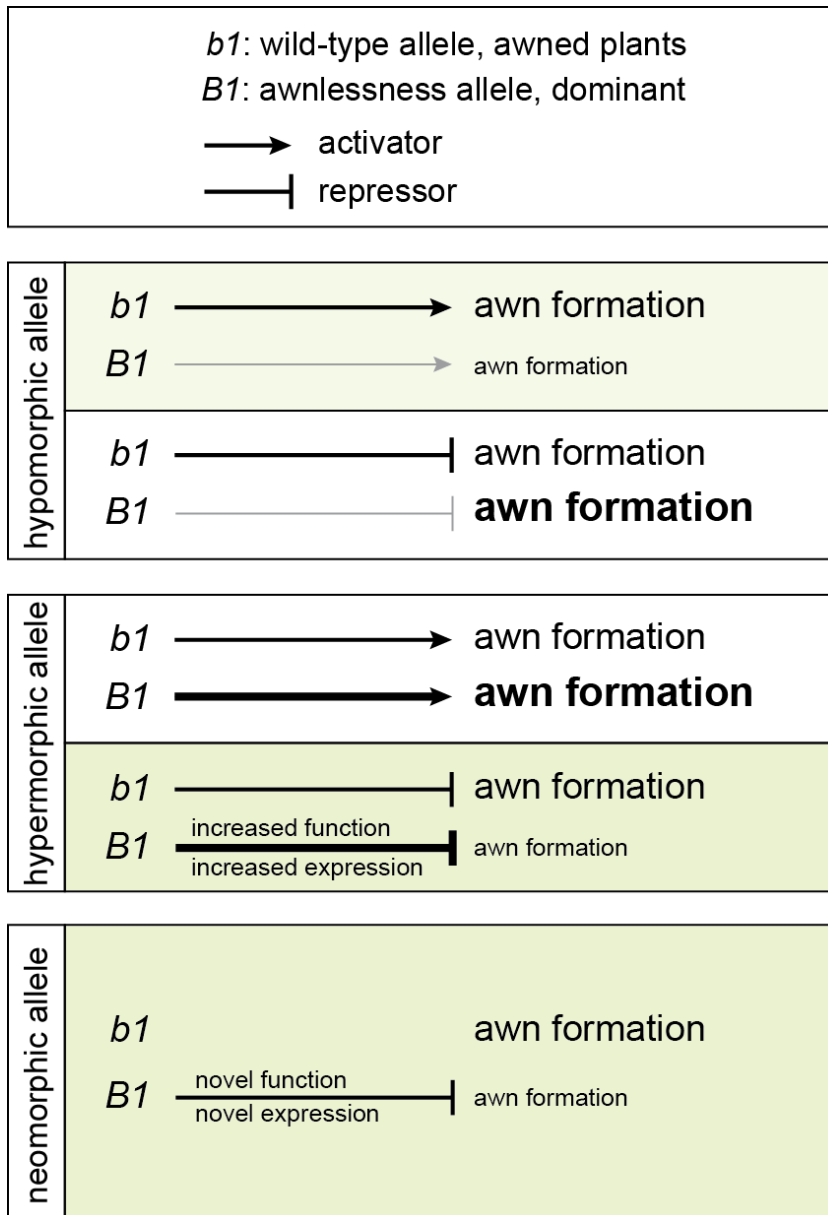

**Fig. S4.** Schematic presentation of the possible modes of action of the wild-type *b1* allele and the awnlessness-conferring *B1* allele, shown for the theoretical scenarios of *B1* being a hypomorphic (reduced activity), hypermorphic (increased activity), or neomorphic (novel activity) allele. *B1* being a hypomorphic allele of an activator of awn formation appears less likely, as then *B1* could only be dominant if there was a threshold level of activity that is not reached in heterozygous plants.

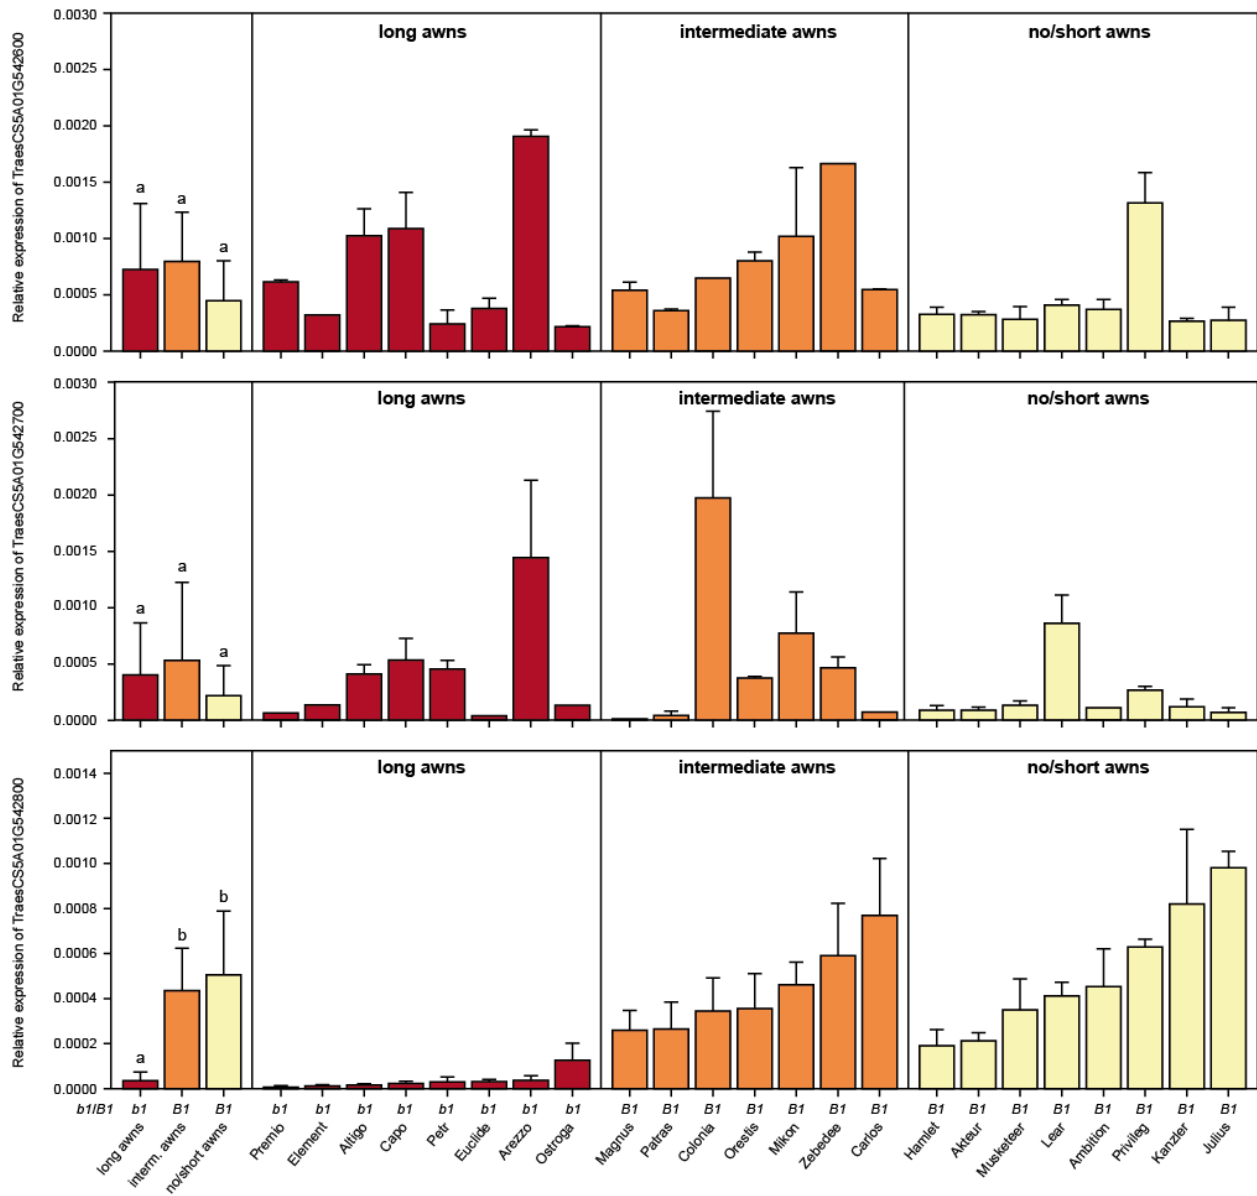

**Fig. S5.** Expression of the three candidate genes TraesCS5A02G542600, TraesCS5A02G542700 and TraesCS5A02G542800 in developing spikes determined by qPCR. Samples were taken from at least ten plants per genotype. The whiskers represent the standard deviation and different letters indicate significant differences between the three groups.
